# Supplementary material for: Short-course quinazoline drug treatments are effective in the Litomosoides sigmodontis and Brugia pahangi jird models
Source: PubMed Central journal article supplement (PMC6931063; doi:10.1016/j.ijpddr.2019.12.001), 2019-12-10

# Supplementary Figure 1

[A]

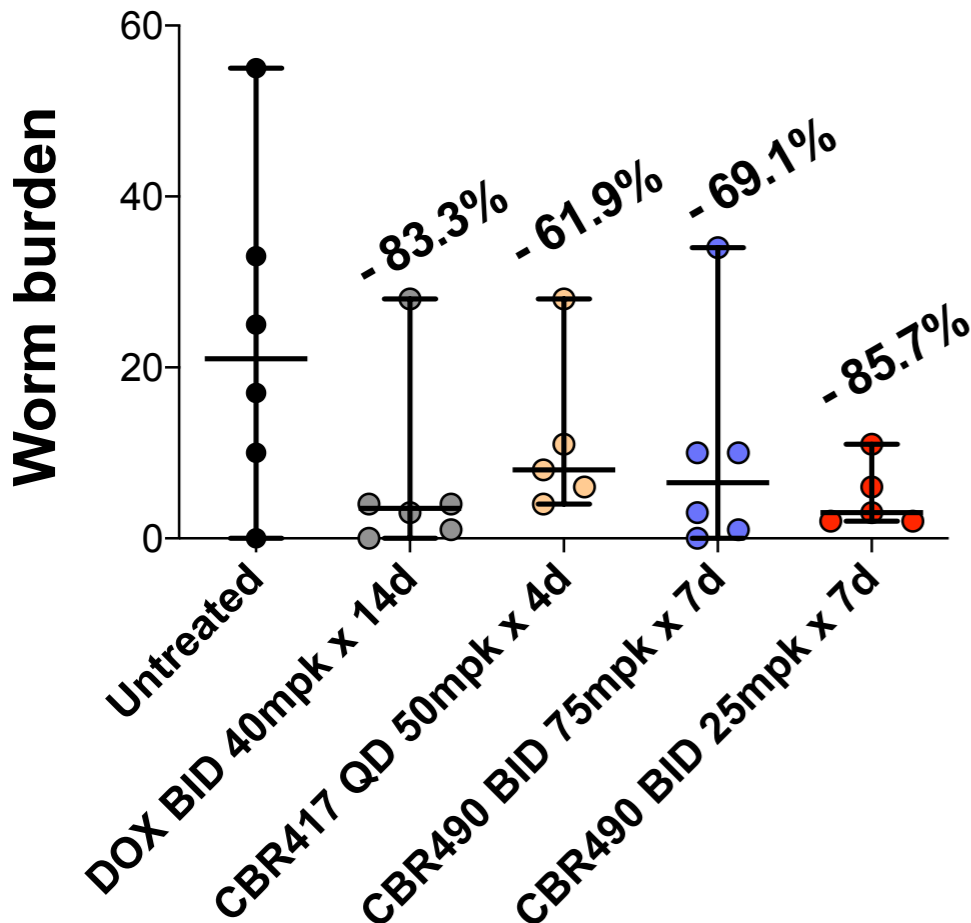

[B]

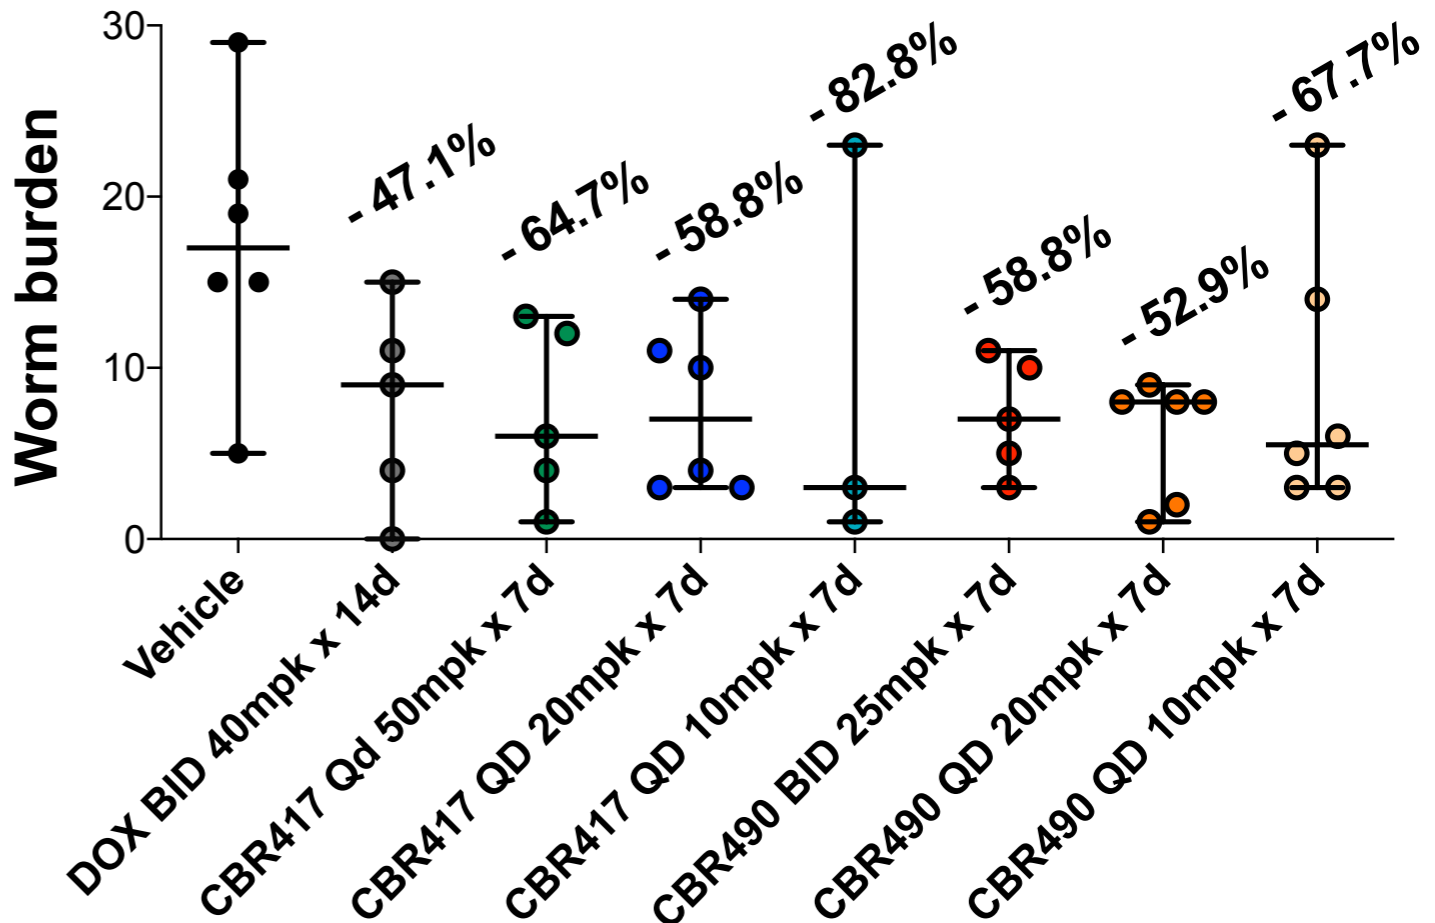

## Supplementary Figure 2

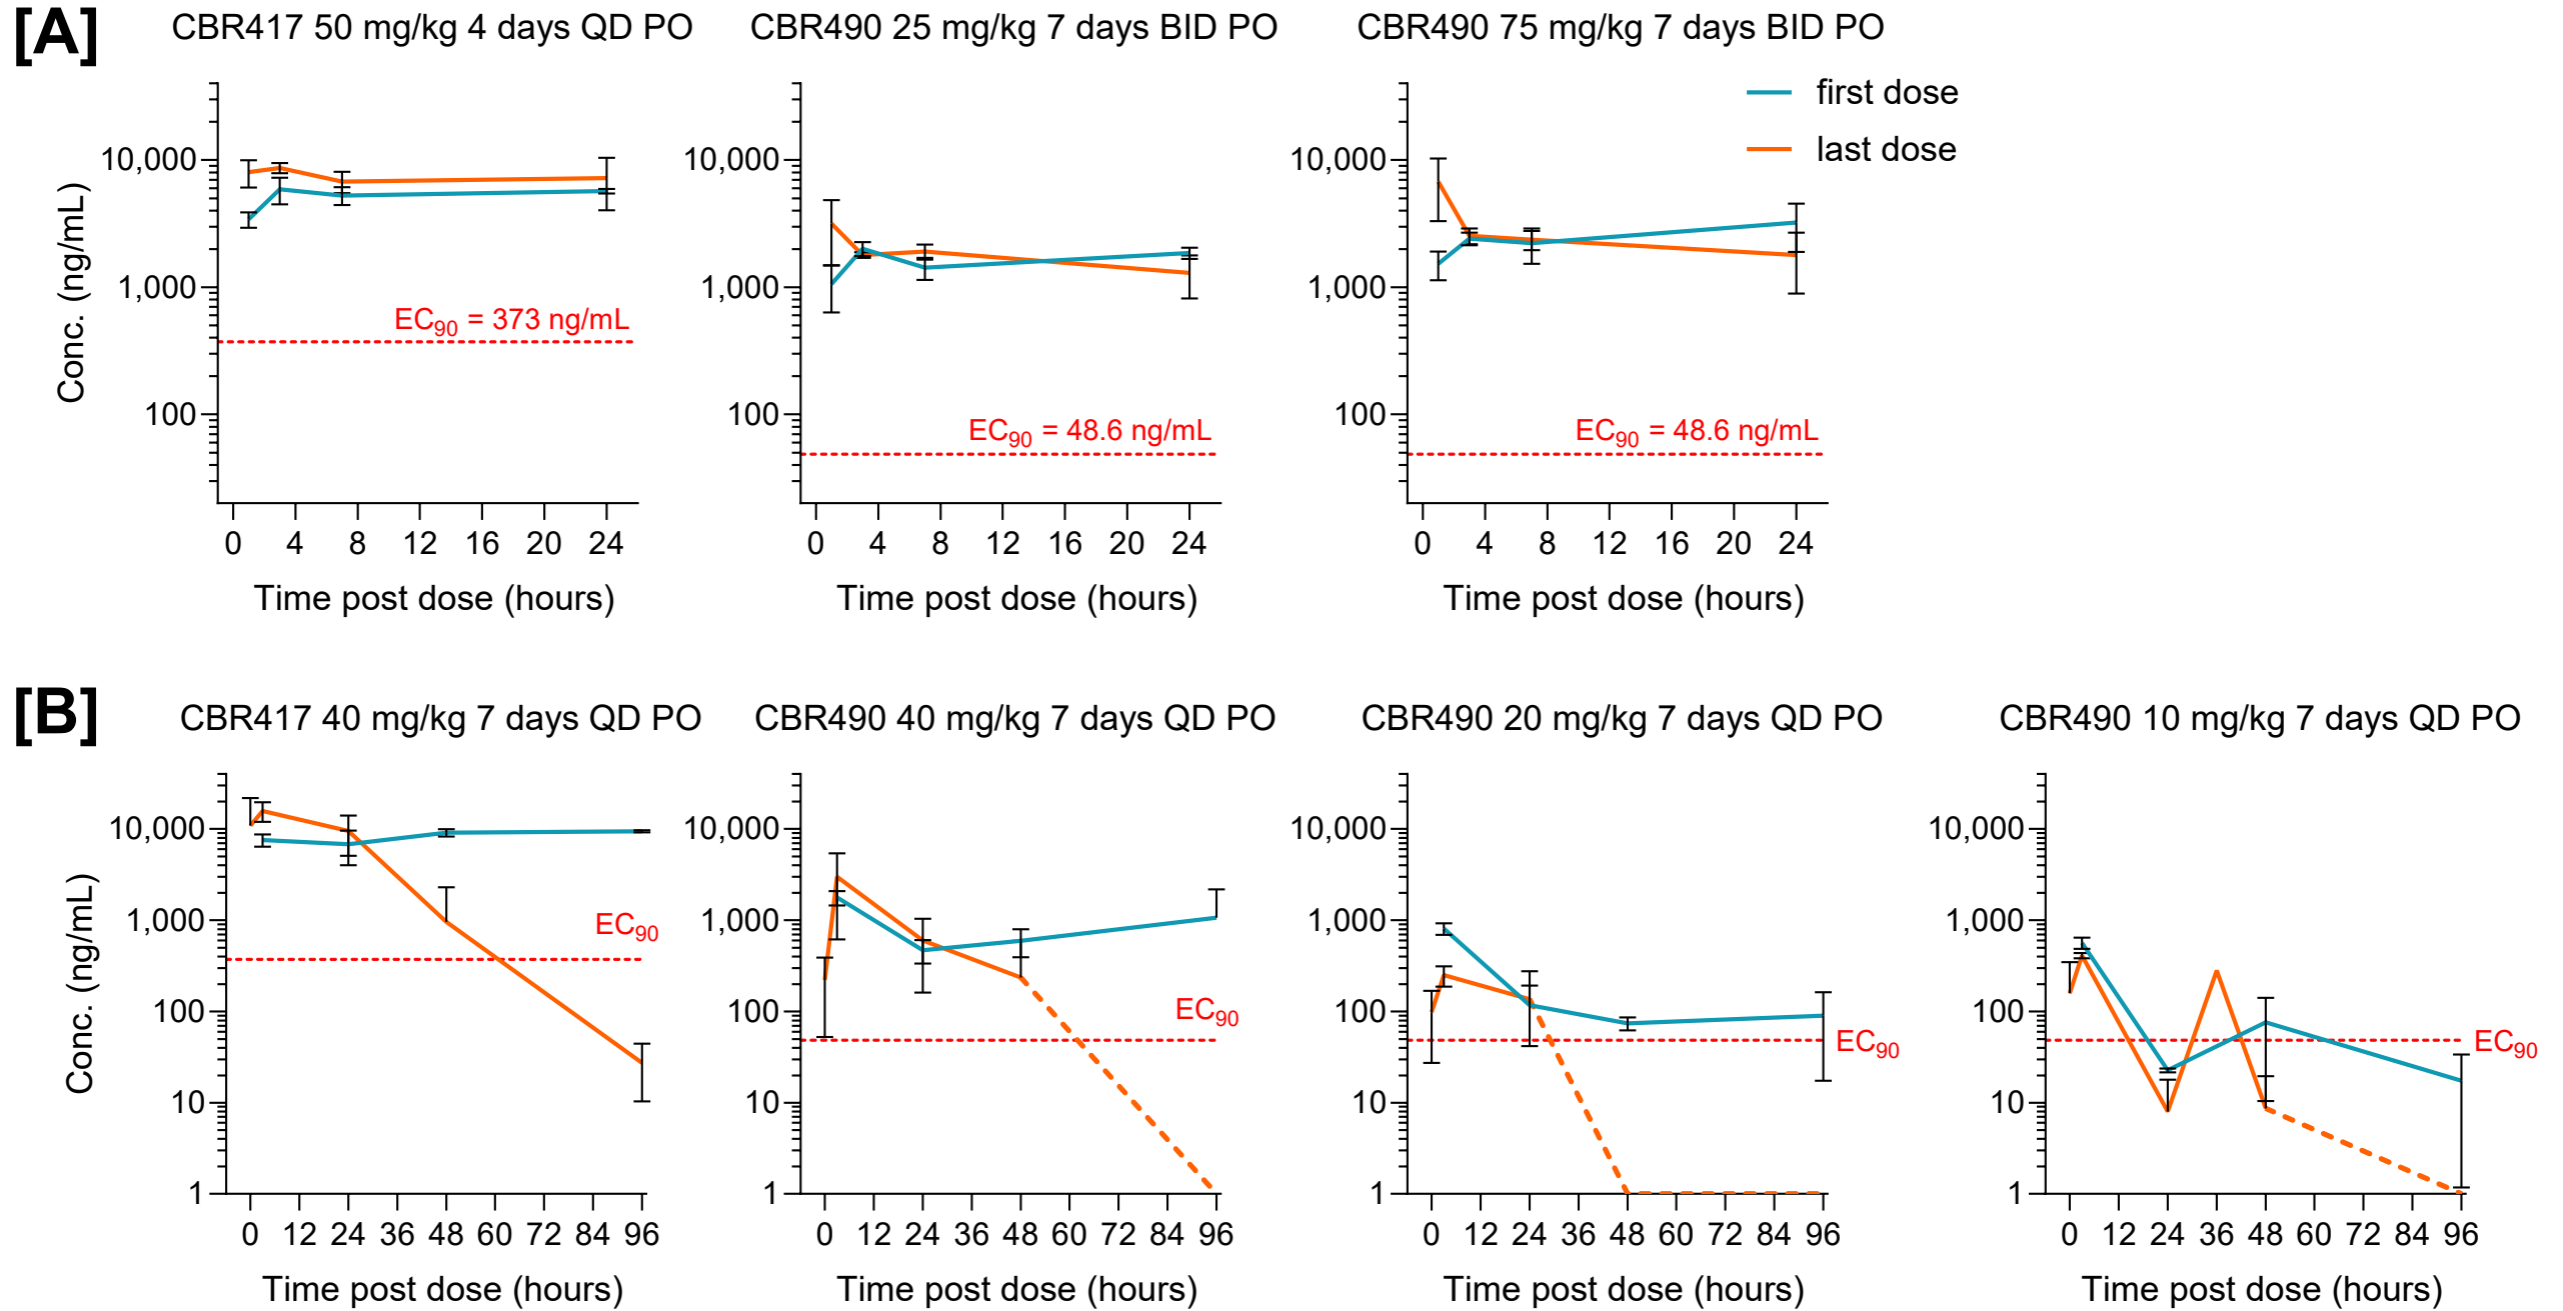

Supplement: mmc1.pdf [file mmc1.pdf]
